# Supplementary material for: The cooperation effect in the Au–Pd/LDH for promoting photocatalytic selective oxidation of benzyl alcohol
Source: Royal Society of Chemistry journal article supplement (doi:10.1039/c7cy02006f), 2017-11-20
Supplement: c7cy02006f1.pdf [file c7cy02006f1.pdf]

# Supporting Information

## **The cooperation effect in the Au-Pd/LDH for promoting photocatalytic selective oxidation of benzyl alcohol**

Zhitong Wang,<sup>a</sup> Yujie Song,<sup>a</sup> Junhua Zou,<sup>a</sup> Liuyi Li,<sup>b</sup> Yan Yu,<sup>b</sup> Ling

Wu <sup>\*a</sup>

a: State Key Laboratory of Photocatalysis on Energy and Environment, Fuzhou University,  
Fuzhou, 350116, China

b: Key Laboratory of Eco-materials Advanced Technology, Fuzhou University, Fuzhou,  
350116, China

E-mail: wuling@fzu.edu.cn (L. Wu)

## 1. Supporting Figures

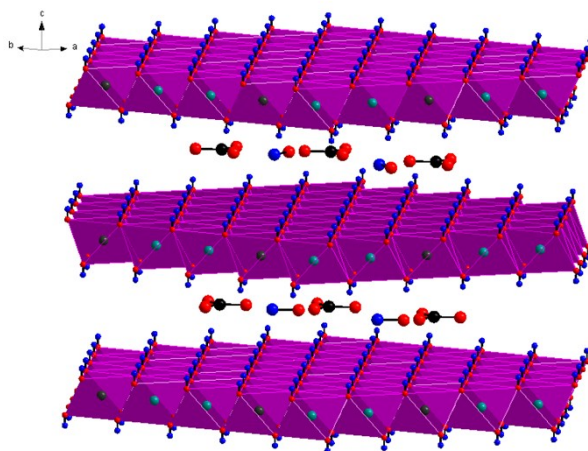

**Figure S1.** idealized structure of carbonate-intercalated LDHs (dark brown : trivalent metals; light green : divalent metals; red : oxygen atom; blue : hydrogen atom; dark : carbon atom)

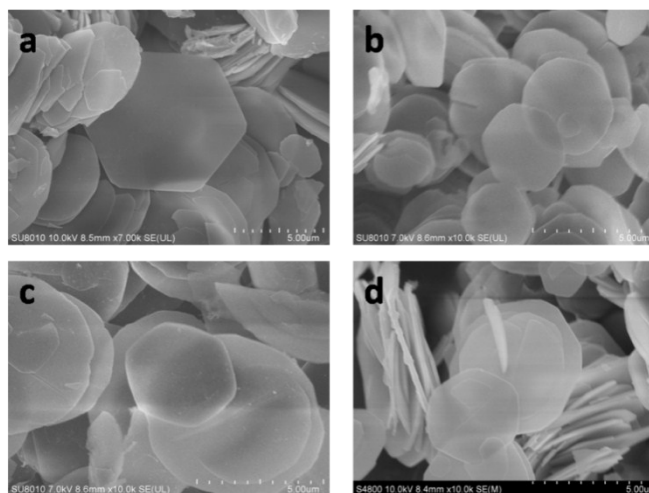

**Figure S2.** SEM images of LDH (a), Au/LDH (b), Pd/LDH (c) and Au<sub>9</sub>-Pd<sub>1</sub>/LDH (d).

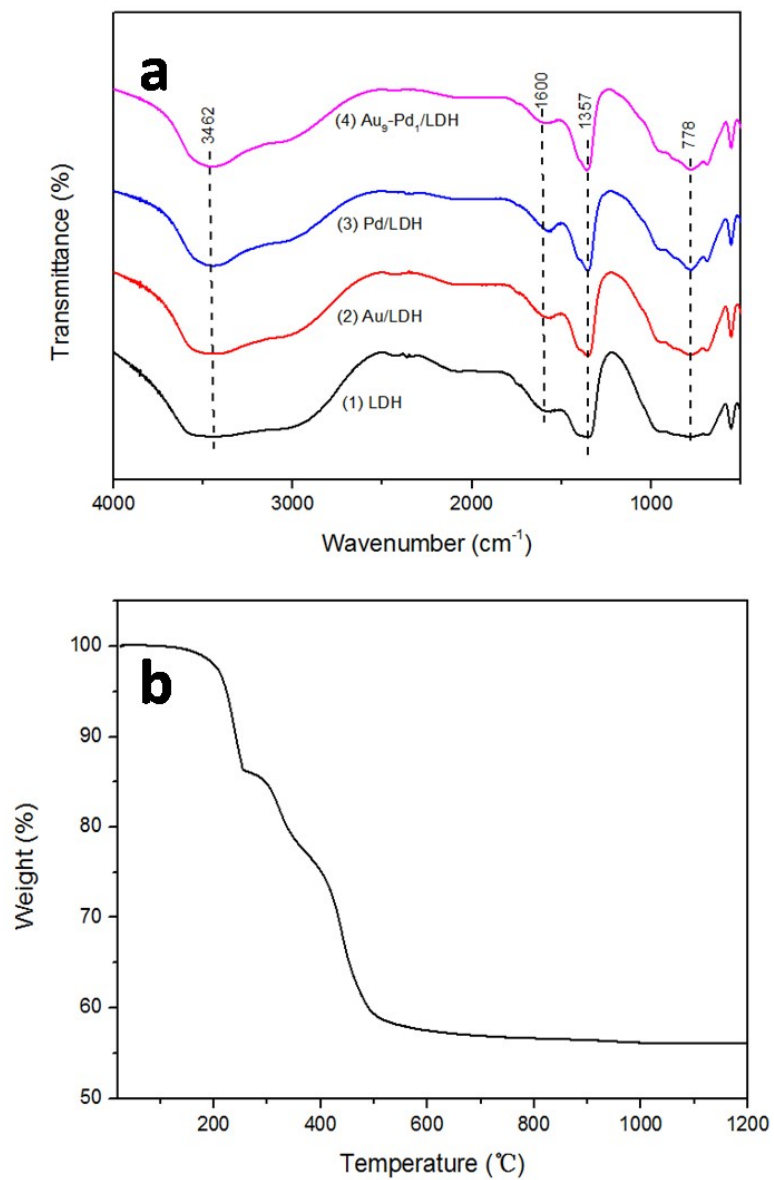

**Figure S3.** (a) FT-IR spectra of the LDH (1), Au/LDH (2), Pd/LDH (3) and Au<sub>9</sub>-Pd<sub>1</sub>/LDH (4).

(b) TG analysis of LDH.

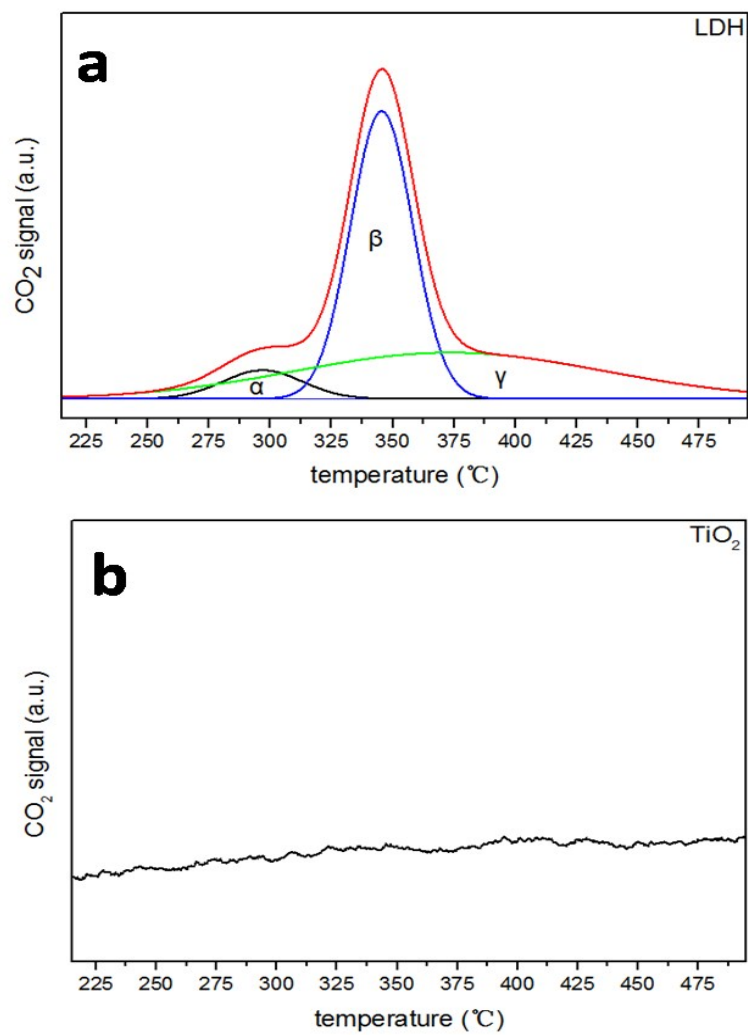

**Figure S4.** CO<sub>2</sub>-TPD curves of the LDH and TiO<sub>2</sub>.

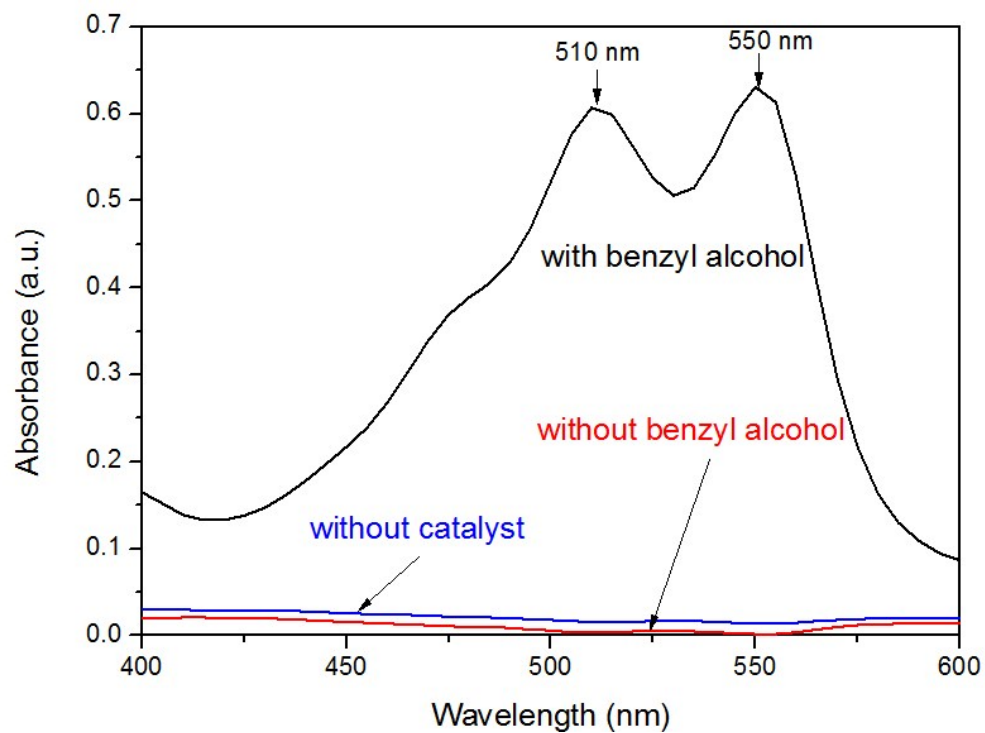

**Figure S5.** Absorption spectra of the DPD/POD reagent. The characteristic absorption peaks at  $\lambda = 510$  and  $\lambda = 550$  nm indicated that  $\text{H}_2\text{O}_2$  was generated.

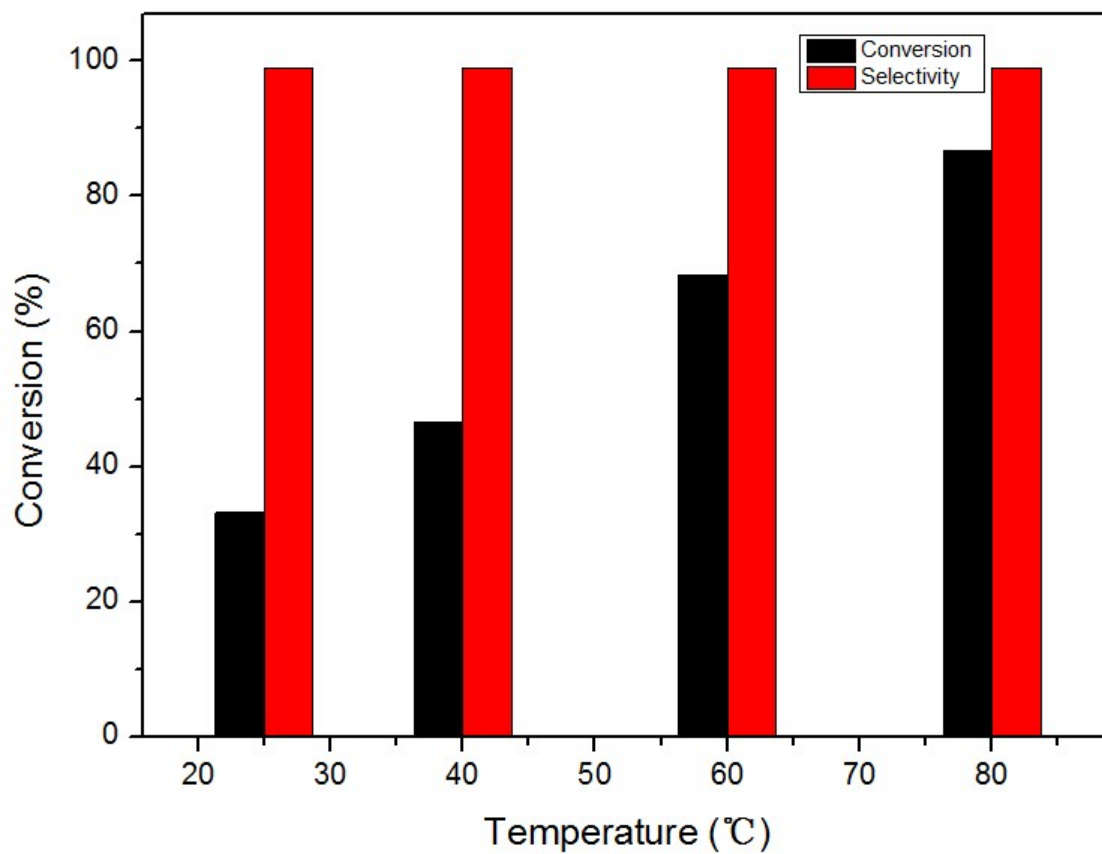

**Figure S6.** The result of thermocatalytic oxidation of BA to BAD over the Au<sub>9</sub>-Pd<sub>1</sub>/LDH under different temperatures.
